# Supplementary material for: Formulation of nanopesticide with graphene oxide as the nanocarrier of pyrethroid pesticide and its application in spider mite control
Source: Royal Society of Chemistry journal article supplement (doi:10.1039/d1ra06505j), 2021-01-01
Supplement: d1ra06505j1.pdf [file d1ra06505j1.pdf]

Electronic Supplementary Material (ESI) for RSC Advances.  
This journal is © The Royal Society of Chemistry 2021

## **Formulation of nanopesticide with graphene oxide as the nanocarrier of pyrethroid pesticide and its application in spider mite control**

Xiaoduo Gao,<sup>‡ab</sup> Fengyu Shi,<sup>‡ab</sup> Fei Peng,<sup>cd</sup> Xuejuan Shi,<sup>ab</sup> Caihong Cheng,<sup>cd</sup> Wenlong Hou,<sup>cd</sup>  
Haicui Xie,<sup>ab</sup> Xiaohu Lin,<sup>\*c</sup> Xiuping Wang,<sup>\*bc</sup>

<sup>a</sup> College of Agronomy and Biotechnology, Hebei Normal University of Science and Technology, Qinhuangdao 066000, PR China.

<sup>b</sup> Hebei Key Laboratory of Crop Stress Biology (in Preparation), Hebei Normal University of Science and Technology, Qinhuangdao 066000, PR China.

<sup>c</sup> Analysis and Testing Center, Hebei Normal University of Science and Technology, Qinhuangdao 066000, PR China.

<sup>d</sup> Hebei Key Laboratory of Active Components and Functions in Natural Products (under planning), Hebei Normal University of Science and Technology, Qinhuangdao, 066004, PR China

<sup>‡</sup> These two authors contributed equally.

<sup>\*</sup> Corresponding authors.

E-mail addresses: wangxiuping0721@163.com (Xiuping Wang)

xiaohulin2008@163.com (Xiaohu Lin)

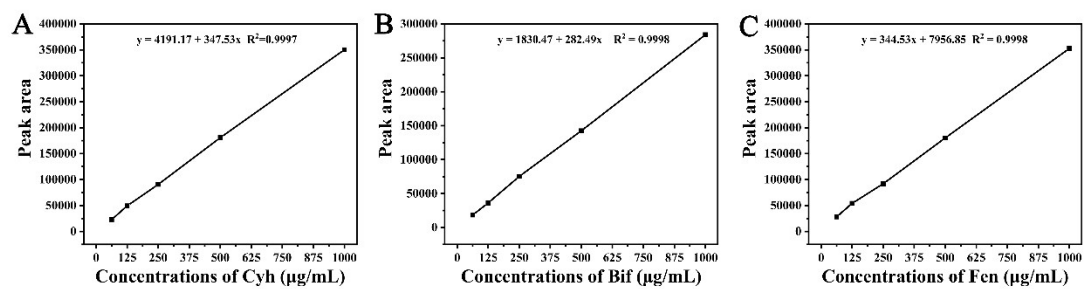

**Figure S1.** HPLC standard curves of three pesticides.

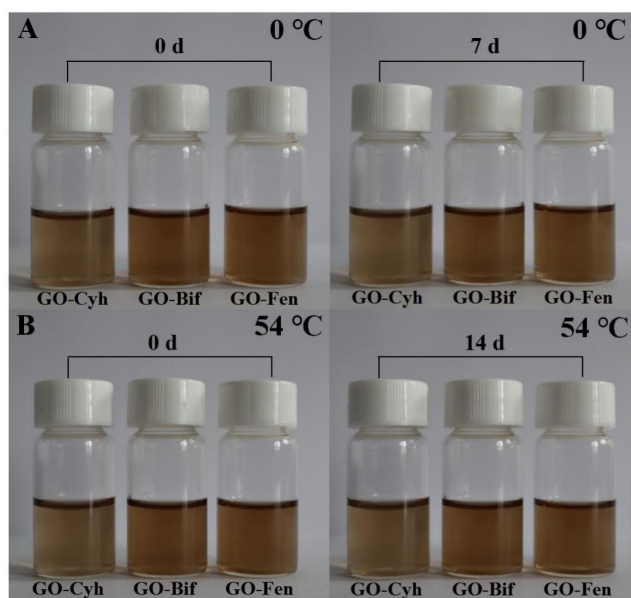

**Figure S2.** Images of GO-pesticides under storage of (A) 0 °C for 7 d and (B) 54 °C for 14 d.

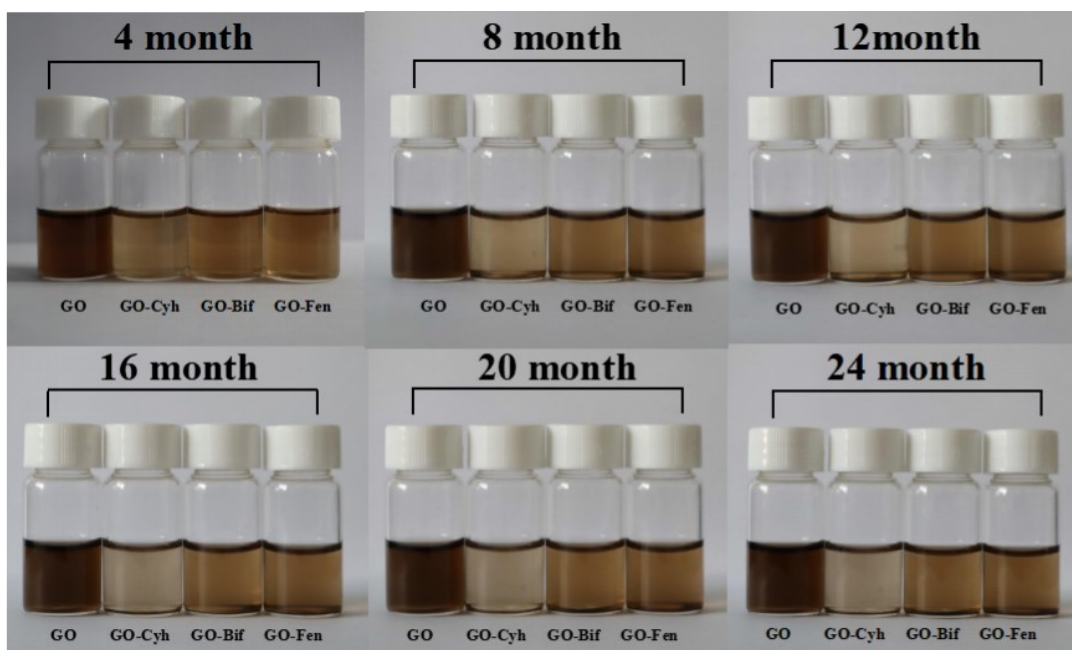

**Figure S3.** Images of GO-pesticides under long-term storage.

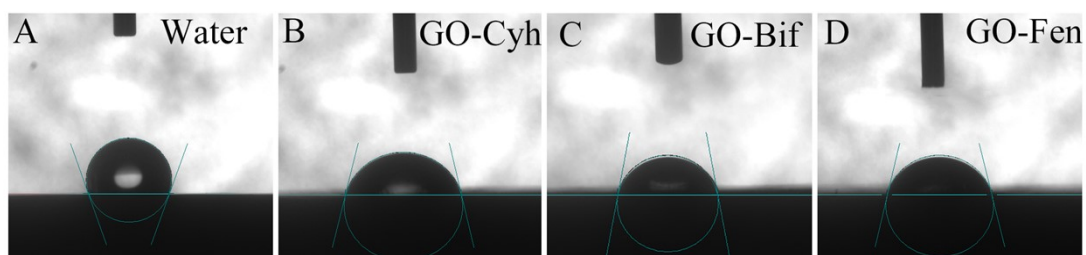

**Figure S4.** Contact angles of Water (A), GO-Cyh (B), GO-Bif (C) and GO-Fen (D) on the surface of paraffin film.

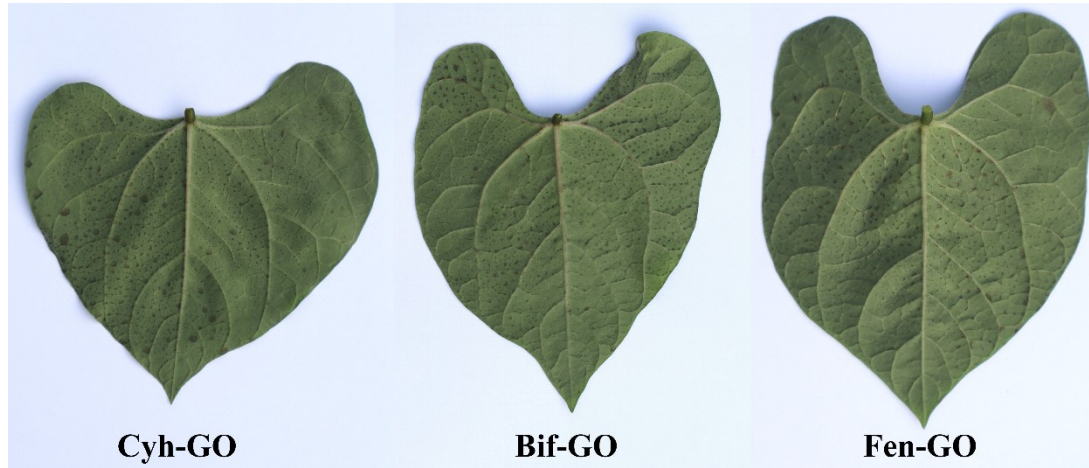

**Figure S5.** Photographs of adsorption and dispersion of GO-pesticides on bean leaves.
